# Supplementary material for: Changing Hydrozoan Bauplans by Silencing Hox-Like Genes
Source: PubMed Central journal article supplement (PMC1931613; doi:10.1371/journal.pone.0000694), 2007-08-01
Supplement: pone.0000694.s001.pdf [file pone.0000694.s001.pdf]

cDNA Cnox-1

AACTCGTCAAATCAATTCATTGTTATAATTATATGCTACAAGATTGTTAGTAAAGATAAT 60  
ATAAATATCAAACACTATTCTTAAAAAAGGTA **GTTTACTTTTCAGCAATTATT**TTTAAATC 120  
TATTAATGAATTAGTAAATTAATACTAATGGAAATTTCTCGTTTGCAACAAATTGATTC 180  
M E I S R L Q Q I D S  
AATTCAAAATAATGACAATGATGATAGATACCACTATGCACACAATCAAGAACACCTGC 240  
I Q N N D N D D R Y H Y A H N S R T P A  
TTTGATATCAAGCCACGCTACAAATTTTCGATCTGCTTTTCTCCAACAACCTCTGTCAAG 300  
L I S S H A T N F R S A F L P T T L S S  
**TCACCAATATCAAAGTAGCGTTATAAGAAATATCGATAATAGTACGGATACGACAAGTTT** 360  
H Q Y Q S S V I R N I D N S T D T T S F  
**TGGTTCCTTTAGTCACGGAAATGAAAGTTCAACACACAATAGCTTACCGTATCCTCCGAA** 420  
G S F S H G N E S S T H N S L P Y P P N  
**CTCGACTCATATCGAACTACCGTCTTATTTATCAAATACAGGTTTACCGCCAGCAACATC** 480  
S T H I E L P S Y L S N T G L P P A T S  
**TAGTTTATCAGCATTCTATAATCCAATTCATTCTTCGTCGCAAGCACACCTCGCAGAATA** 540  
S L S A F Y N P I H S S S Q A H L A E Y  
**TCAACAATGGCCGTACGGCAACGTTTACCTTCTGGGAATTATATATACGGATATGGTAG** 600  
Q Q W P Y G N V S P S G N Y I Y G Y G S  
**TCCGATGAATAACGGATTCAATCCGTATTCTTCTGTTGATAGTAATGGATTGTCAGGATC** 660  
P M N N G F N P Y S S V D S N G F A G S  
**GAGTTCCTGTTTATATAGAGATATTGATAGTAAACGAAACGAATGACTTATTCGAGAAA** 720  
S S W L Y R D I D S K R K R M T Y S R K  
ACAGTTATTAGAACTTGAAAAAGAATTCCTACTTAAGTCATTTTCTGAAAAAAGAAAGAAG 780  
Q L L E L E K E F H L S H F L K K E R R  
AGTTGACTTGGCAAAACAGCTTAATCTAAGTGAACGTCAAATAAAGATTTGGTTTCAA 840  
V D L A K Q L N L S E R Q I K I W F Q N  
TCGTAGAATGAAGTTTAAAAAGGAAAATAAAAAAAGTTTCCAGTTCTGAATCAATTATGAA 900  
R R M K F K K E N K K T S S S E S I M N  
TCAAGAAGCACCAAAAATTTGAAGAACATCCTGATATCATTCTGAAAATGTAAGTGAACA 960  
Q E A P K I E E H P D I I S E N V T E Q  
ACAAGAAACAAATGAAAATATAGAAAATGAAGAAAAAGATAAAAAAATGAATATTCAGCA 1020  
Q E T N E N I E N E E K D K K M N I Q Q  
GATAAATTTGAATGATATGAAAAATTTTCATGATGTCACACGTTGCTAGGATTTAAATGAA 1080  
I N L N D M K N F M M S H V A R I  
CTATTTACGTTAATTTGCTTTTTCATTTTCGATACGATCTTTACCAGAGATAAAAGGTTTAT 1140  
CGTACAAGGTACACTTGTATGACAAACAAGTTTTTATTTGCTTGCTTTTTTTAAGTAAAAG 1200  
TTCATACAGTTCTTCATTTGCGAAAAAAAACAAAAATAAAATGAATTTGCGATTTTACAA 1260  
ATTTAAAAATATGAAAGGTTTCAACTTCGTTGCTGTTATGAAATAATCTATATGTATATA 1320  
CAAAAATTATTTACAACGCTTTAGAAAAAATAAACTTGCAAATAATAATTACACAAAAT 1380  
TTAAAAAATAAAAAA 1396

cDNA Cnox-2

CATTTGATTACAACAGTTGTCAAAGAAGGAAGAAATAGTTTCGATTGAACAAATATTAGTG 60  
H L I T T V V K E G R N S S I E Q I L V  
AAAAAAAAAGATATGTCGACTTCAAAGTCGTTTCTTATCGATACAATTATGCATGAAAAA 120  
K K K D M S T S K S F L I D T I M H E K  
**CAGAAACTATTATTACGTAGCAAC**AAACCGCTGCACCTTAC**CGTCAAGGGAATCTTCTCCA** 180  
Q K L L L R Q Q Q P L H L T S R E S S P  
GTTTCAGACCATTCTACTTCAAGATTGATGATGTCATCAGAAGATATTAGGTATAACAGA 240  
V S D H S T S R L M M S S E D I R Y N R  
TCCCCTGGTTCTTCGCCTCGTACTCCACCAACACCTCAAGTTATGGACTTTCACATGATG 300  
S P G S S P R T P P T P Q V M D F H M M  
GAAAGATCAAGAGCTATTGCATATTGTAATATGAGATGTTCAAGCATTGTGCAAGCTGT 360  
E R S R A I A Y C N M R C S S I C A S C  
CCCCACACCCTGGTCAACCGATTTGTACTTTGTGTGAACCGAGAGAGGGAGAAGCTGCG 420  
P P H P G Q P I C T L C E P R E G E A A  
CCATCTCAACACATGTATACATATTCAAGAGAACCATGTACTAGACACCCGTTTTCAATG 480  
P S Q H M Y T Y S R E P C T R H P F S M  
AATCGCGGATCTGCTCGACCTTTAAACCCCTCACCTCATCTTCAAGACTTCAACAGATA 540  
N R G S A R P L N P L T S S S R L Q Q I  
TCCCAACTTTTGTGCGTGAATTGGAAAATCGGAGAATGCGTTCACAACATGAACACGAA 600  
S P T F V R E L E N R R M R S Q H E H E  
CAACAGATGTGCTCTAAATCTAAACGCATACGAACCGCATAACAGAGTATTAGTTGTTA 660  
Q Q M C S K S K R I R T A Y T S I Q L L  
GAACTAGAGAAAGAATTTCAAATAATCGATATCTGTCTAGATTAAGACGTATACAAATC 720  
E L E K E F Q N N R Y L S R L R R I Q I  
GCTGCCATGCTAGACTTAAACAGAAAAGCAGGTTAAAATTTGGTTCCAGAACAGGAGAGTA 780  
A A M L D L T E K Q V K I W F Q N R R V  
AAATGGAAGAAAGATAAAAAAGGCTCGCATGGTTATTTCCCGAGCTCACCAATCAATAGC 840  
K W K K D K K G S H G Y S P S S P I N S  
CCGGAATCTCCCATGTAAAAATAAACAGGAGAAATTGAAAAATACTCATATATTCAAACA 900  
P E S P M  
TTATTTTCGTTTAAATCAAATAGAAAATCTTTCTTGAATACTATATTCTTTATTAACA 960  
  
ATATGTTAAAATTTTTCTAATCGCTAACAAATGAGATTTGGAATTTTATTTATGCATTTTC 1020  
TGACAAGCTCCAGTTGACATAAAGATAATCTATATTAATCAGAAACCTATTCATAAAACA 1080  
CTTTGCATGTCAAAAAAGTGTAACGCGTTTTTAAATTTCAATCGTTAATTTAGTTTTAAGT 1140  
AAAAGTTTAGCACTCATCACTAGTGCCAAACCTTTTTTTAAGAGTTATAAAGTTACTCAG 1200  
TTATAATTTATTAATGATCTCCTTTGCAGAGACCTATTCTATTATGTTCCGTTTGAATT 1260  
TGTAATATAGCACTTGATATAATTTATTTATTTATTTGCCAATTTATATACATTTCTAT 1320  
ACAACAATTATAATATTCAAATAAAATTTAAATATATATTAATCTAAAAA 1371

cDNA Cnox-3

ACAGATAATACACAAACTAATCTTGAGTCACTGTGTATAAGGTTTCATGATATTTAGATA 60  
GAAAAATCTTGAATAATTATCAA**AACATAATAAACATCAATTCAAAAA**AATTATTTTTTCA 120  
CTGATGAATTCATTTAATTTTTGAAGATAATCTTAATAAAGATGCATTGTATAATCGCCAT 180  
M N S F N F E D N L N K D A L Y N R H  
CCTCATGTTTCAGAATTATTCTTATCTATCAATAAATGTAAACAACCAAATGATGATGCG 240  
P H V Q N Y S Y L S I N C K Q P N D D A  
TATGTGTATAATAGACAACGTGTTCCAAGCTCTCCAGAGATTCACGGTGATACTAGAATG 300  
Y V Y N R Q R V P S S P E I H G D T R M  
GAGCAATTGAGTCAACGTTCCATACCAGACATTACAAAGTCGAAGCCATGAAACAGAAGCT 360  
E Q L S Q R S Y Q T L Q S R S H E T E A  
CCCGATTATTATTTCATATGAGCATATTGATGATGCAAACAAAACGCTAAACTATCATTAT 420  
P D Y Y S Y E H I D D A N K T L N Y H Y  
ATGAATAAAAATACTTACGATAATAATACATGGCAAACAATACACCTCTATCTTGGCAT 480  
M N K N T Y D N N T W Q N N T P L S W H  
CATAATATAACATCTCAGCCAGCAGCTTGGCATTC AACGCAAAC TAATACCACACCCCAA 540  
H N I T S Q P A A W H S T Q T N T T P Q  
TTGGATCAAGGTTATATGTCTTGGAATTGTTGCTATGTTGACAGTAAACGGAAAAGAACT 600  
L D Q G Y M S W N C C Y V D S K R K R T  
TCATATTCGCGTAGACAAATATTTGAACTTGAAAACGAGTTTAATAGAAGTCGTTACATC 660  
S Y S R R Q I F E L E N E F N R S R Y I  
ACACGTGAAAAAAGAATAGAATTATCCATGATATTAACCTTAACGGAGAGACAAGTTAAA 720  
T R E K R I E L S M I L N L T E R Q V K  
ACATGGTTTCAAATCGTAGAATGAAAACAAAGAAAGAAAAGACAATGGATGATACTTCT 780  
T W F Q N R R M K T K K E K T M D D T S  
AATGACTGTTTCGATTA AAAAGTAAA ACTTAAATATCAATAACACTTCAATGAAAAATTATA 840  
N D C S I K S K T  
AAGAATGAATGGAAAATACGAAAGCTTAACTACTGCATACAAATGTAACGCAATTGTTGT 900  
TATAGATCATTTTTACGTGAAAGTTTAAAGGTAAC TAAAAA AAAAA 943

cDNA Cnox-4

TACGGAATAGTTGATAAAATTTT**TTTCTCAAAATGATTGATACAACAC**TCAACACGATGCT 60  
M I D T T L N T M L  
GTATTGGGACAACAAATCTTTAGATATTTTTGAAGACAAAAGTGGATTGGGGTTTGAAGT 120  
Y W D N K S L D I F E D K S G L G F E V  
GAACAACACTATTTTCACTAAACATCAATACAACAACCTATCTTATCCAAACTTCATCAA 180  
N N Y F T T K H Q Y N N L S Y P N F I N  
TGATGACAATATAAAGTGTAGCTTAACTCAAACACAAAGTATCTCGAAATCTCCTAAAAG 240  
D D N I K C S L T Q T Q S I S K S P K S  
TGCAGAGATTACTGTCAATAAATGCAACACGAACAAGACAACCTTAATCCAACAACAAAT 300  
A E I T V N K L Q H E Q D N L I Q Q Q I  
TCAAGACCGTACAATTTTCATTAACAA**ATATGAACAACCCCTCACGAGCAGTTGGCCAAC** 360  
Q D R T I S L T N M N N P L T S S W P T  
**TTATAATCCCTTACCAAGAACAACATATTGATGAATGATCCATCAACATCAACATCTTT** 420  
Y N P L P R T N I L M N D P S T S T S F  
**TACAACACTTCCCTTTCCCATGTATGCTTACTCCGCAAGCGAGCGTGAATGGTTTAA** 480  
T T T S L S P C M L T P Q A S V Q W F N  
**CCGATCCAACATGGTAAATGATCCTTGGGCTATGGAATATGGGCATGATCCTGCCATGCG** 540  
**R S N M V N D P W A M E Y G H D P A M R**  
AAGCAGACCATGTTTTTTCATCTCATCAGACAAGAGAGCTTGAGAAGGAGTTTTTGGTTTG 600  
S R P C F S S H O T R E L E K E F L V C  
TCAATATGTCACTCGCAGGCGACGGATCGAACTTGCATTTTCACTTAATCTATCTGAGAA 660  
Q Y V T R R R R I E L A F S L N L S E K  
ACAAATAAAAACATGGTTTCAAAATCGCAGAGTGAAAAGAAAAGAAAACAAAAGAAATGTT 720  
O I K T W F Q N R R V K E R K Q K K C S  
AAGTGAAAGTGAACGGTCGGCTTCAAAAATATGAAAAGAAAACGTTTCTTGAAGAACAA 780  
S E S E R S A S K I  
TAGCCTCTTCTGTTTTTCGATAAAAAATGGAGCTAGTTGAGGAGACGTAGATGGAAGGTTG 840  
ATATCCGTTGATAGAGACATATGGTATCTGAAAATAAAATTTATCTGTCATCACAAGGAC 900  
GTAATTACGAACAAAAGATTATCCTCGATGAACGCAACCATATGTTGATGAAACCGCAA 960  
TGCATATGATATCTTTCACTTCAAAGTGTTTTTCTTCAAATCAATAAACTTGTTTGAT 1020  
CTTTGTTGACAAAACAGTAATCCAATATGTGCTTTAAATTGTTTTTCTTATTTCAATACT 1080  
TCCGTTTGTAAATTACAAAGAGAGTTTGTAAAACGTAAAGTGCTTGCTTATAACACGCC 1140  
ATATCAAACGCAGAGTAGAAAAAAATTCATATCTTTATCAAAAAAAAAAAAAA 1193

cDNA Cnox-5

TGACAACATAAGAGACTATATA **TAAGTAACATGGCAGAGATTGAAA**AGATTTTTTTCGAC 60  
M A E I E K D F F D  
TTAATTAATTCAAATAATGAATCCATCGATGTTGAAAGGAAAAATTTAAATGACAAAGAA 120  
L I N S N N E S I D V E R K N L N D K E  
ATTAACCCAATGCATACAGCATGTCGGTACTCTAGTCAACATACATATTCTCATACTTTT 180  
I N P M H T A C R Y S S Q H T Y S H T F  
GAATATTTCCCAGGAGATTCTCATGTACAGAAAATAAAAAAAGATGATCAAGCTGCACCT 240  
E Y F P G D S H V Q K I K K D D Q A A P  
ATACAACCTTCCTTGCATGAGCAGTTATTTTAGTAAACCTGGAGAAGTAAGTAACTGATGGTTTT 300  
I Q L P C M S S Y F S K P G E V T D G F  
GAAGATGCGTTTTAAAAAGAGAGATTTCGAAAAGAGATGTTGGAACACCGATAACTTCAAA 360  
E D A F K K R D S Q K R C W N T D N F K  
TGGATAAATATTTAAACGTGAAAAACGGGCAGCGGATGTTGAATCTACTCAAGATAATCAA 420  
W I N I K R E K R A A D V E S T Q D N Q  
AAACAGAGAGAGTTGCACTCGAAGGATATTTGTA AAAAACGTGTATGTTTCACACAAAA 480  
K Q R E L H S K D I C K K R V C F T Q K  
CAGATCGTCGAACCTTGAAAAAGAATTTTATTACAATCGATATCTTACACGTGCTCGGAGA 540  
Q I V E L E K E F H Y N R Y L T R A R R  
GTAGAGATCGCACAAATTGTTAAAACCTTACTGAAGCTCAAATAAAAATATGGTTTCAAAT 600  
V E I A O L L K L T E A O I K I W F O N  
CGTCGCATGAAGCAAAAACGAGAACA AAAAAGATATGGCAACACCGCATTTTCTTGATAAT 660  
R R M K Q K R E Q K D M A T P H F L D N  
CAACTCAATCAGTGCAGTTGACTACACGACTTCTGCCCAGTTAACTTCCCAACTTCA 720  
Q L N Q C A V D Y T T S C P V N F P T S  
TGTCCAGTCGAATTCACAAACAATAGAGCATGGTACAATGCTTGTAATCAAGGAGATTCA 780  
C P V E F T N N R A W Y N A C N Q G D S  
TCTCATTTTCAATCAATCACTTTTCAATTGATCTAATTGAATCGGTATTTACAGGTCAATG 840  
S H F Q S I T F H  
ATTTGTTTGTAAATGTGATAGAATATTTCTCCAAAACCTTCGAATTATCTGATATATTATTT 900  
AAACCATAGTCTATGAGAAATAAGAAAATGAATAAACAAACTGCAGCTCCTTTGAATATC 960  
TATTTATTTAAAAATAGAAGAAAACCTGAAAATAATAGACTTTTAAATTGTAAATATATTAG 1020  
TTTATGAATCTTCGCTTTATTTGAAATATATTATTATCTTTAAAAAAA 1070
