# Supplementary material for: Changing Hydrozoan Bauplans by Silencing Hox-Like Genes
Source: PubMed Central journal article supplement (PMC1931613; doi:10.1371/journal.pone.0000694), 2007-08-01
Supplement: pone.0000694.s002.pdf [file pone.0000694.s002.pdf]

Fig. S4

Day 0

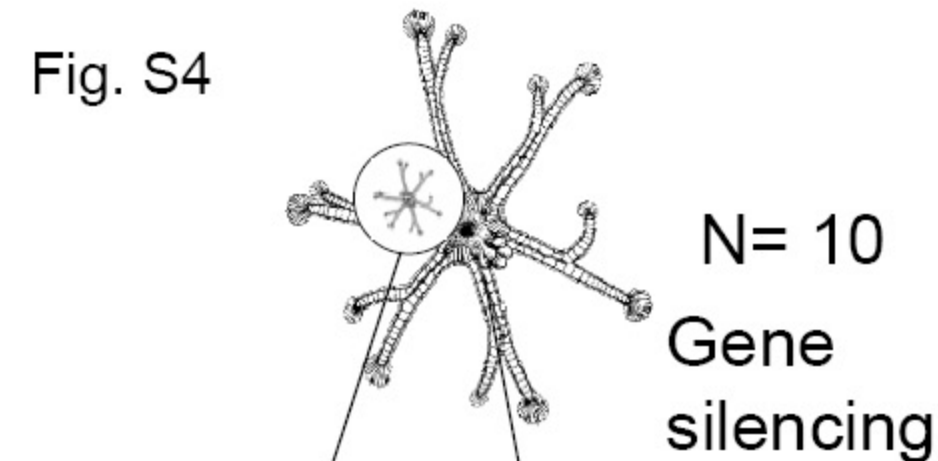

N= 10

Control

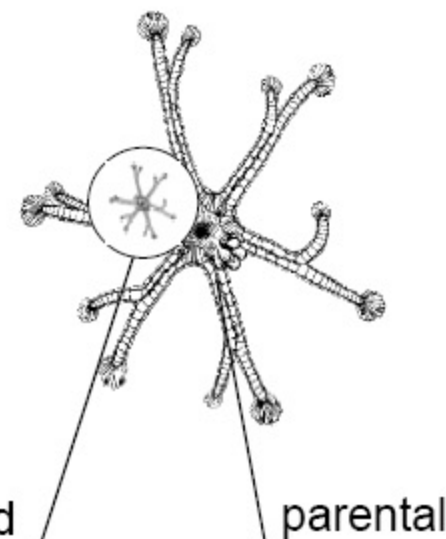

newly formed

parental

newly formed

parental

2 weeks

$N_{\text{RNAi}} = 8.0 \pm 1.9$      $N \leq 10$

$N_{\text{Morpholino}} = 7.8 \pm 1.1$

$N_{\text{RNAi}} = 6.5 \pm 0.7$      $N \leq 10$

$N_{\text{Morpholino}} = 7.0 \pm 1.4$

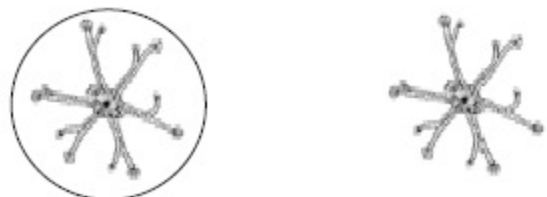

$N_{\text{Morpholino}} = 115.4 \pm 14.7$

18 weeks

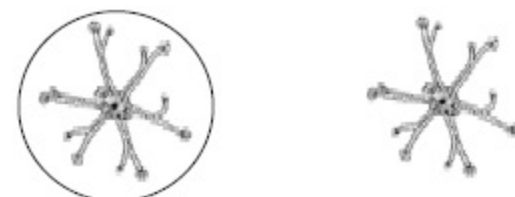

$N_{\text{Morpholino}} = 145.0 \pm 12.9$
