# Supplementary material for: Changing Hydrozoan Bauplans by Silencing Hox-Like Genes
Source: PubMed Central journal article supplement (PMC1931613; doi:10.1371/journal.pone.0000694), 2007-08-01
Supplement: pone.0000694.s003.pdf [file pone.0000694.s003.pdf]

600bp →

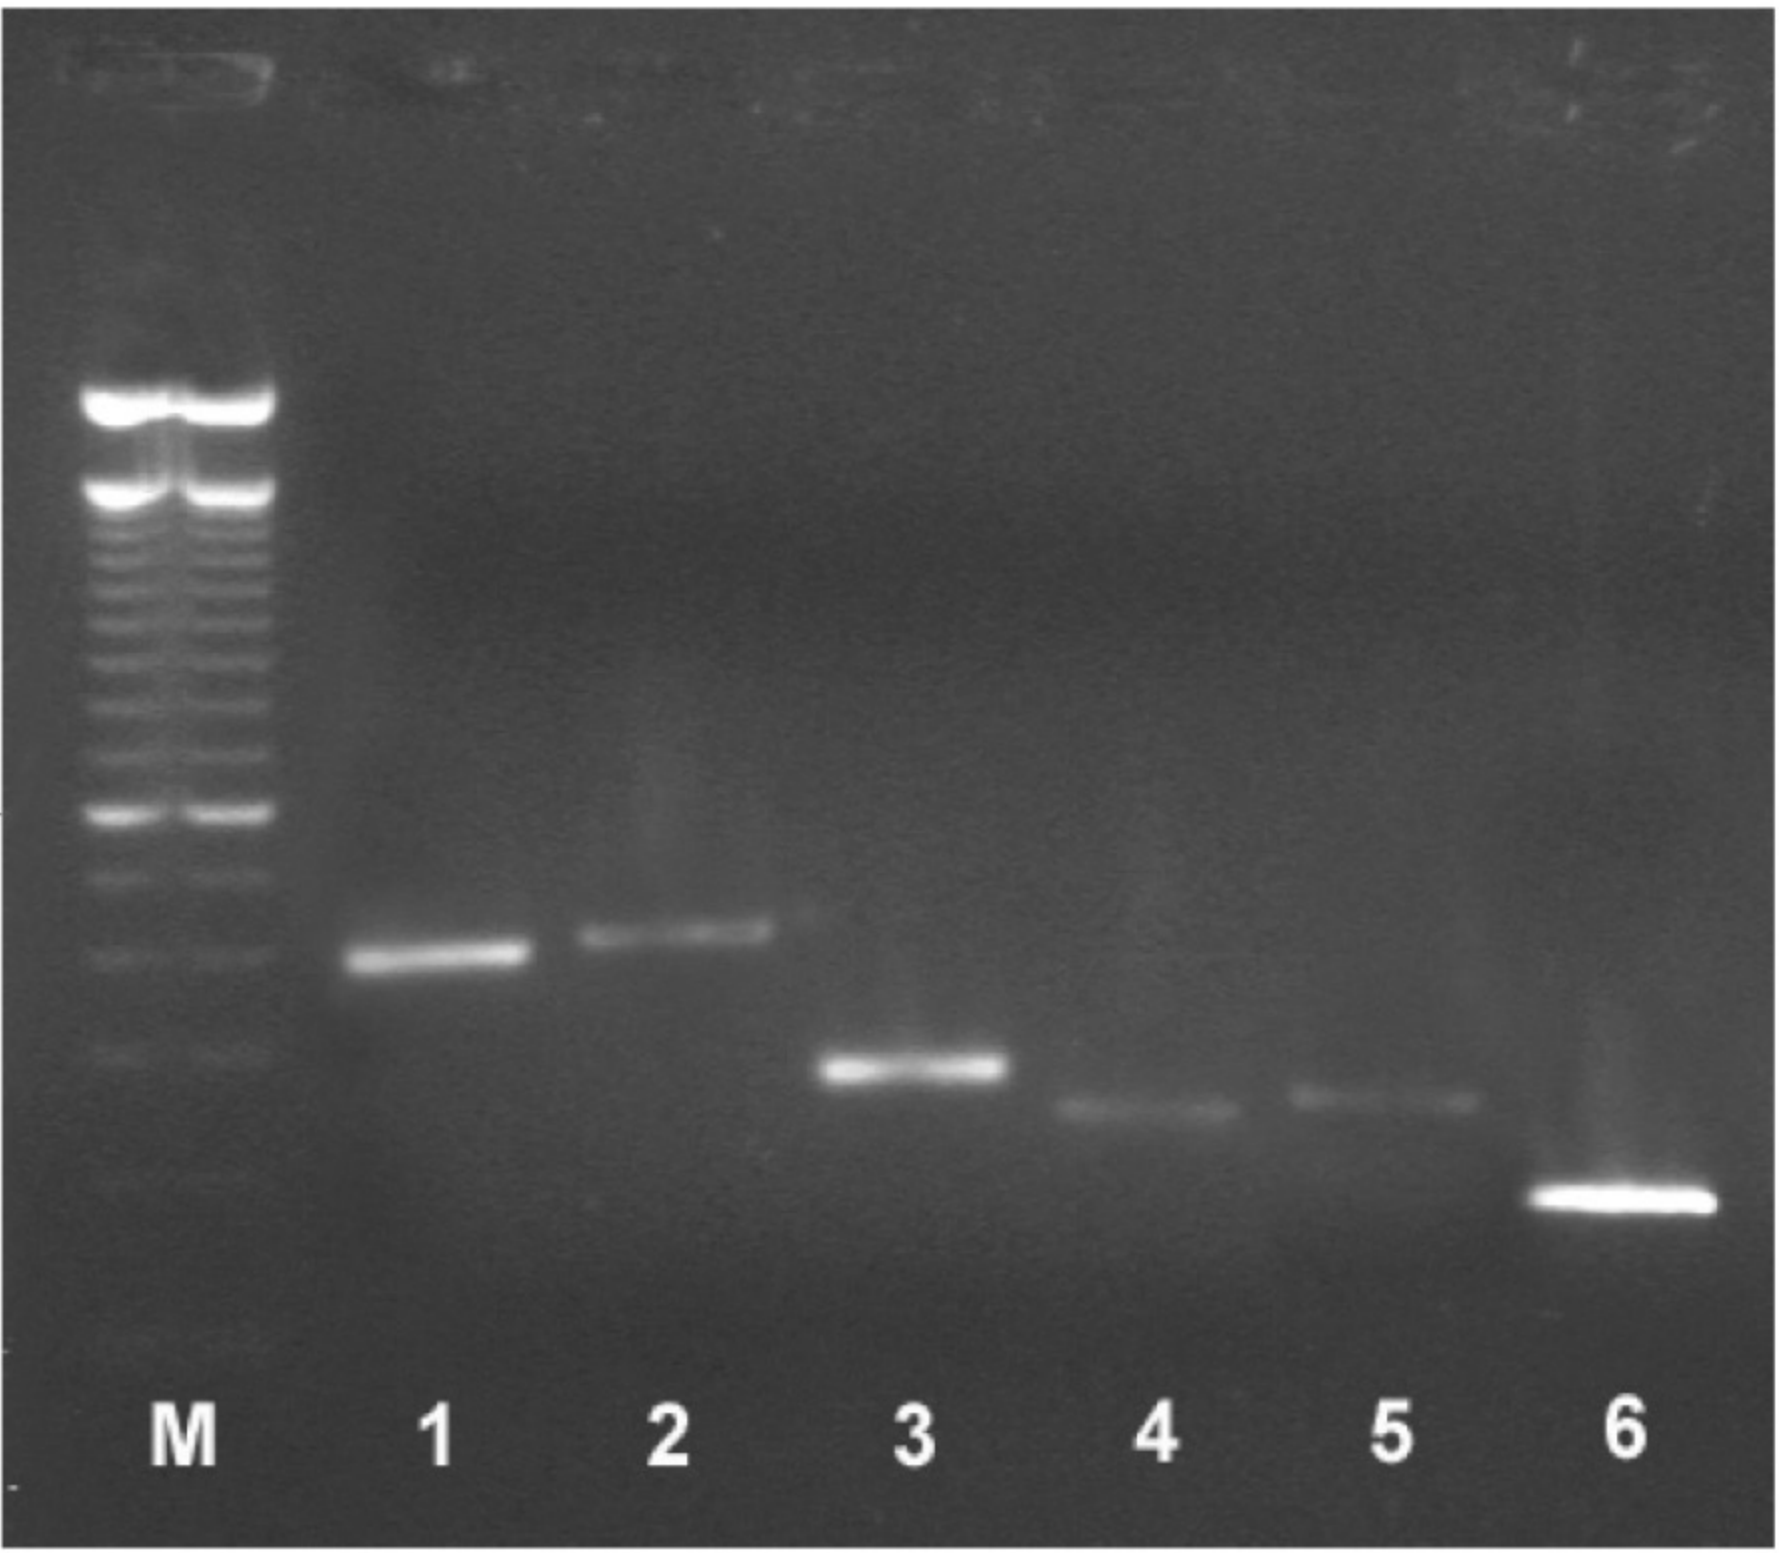

M

1

2

3

4

5

6
