# Supplementary material for: Changing Hydrozoan Bauplans by Silencing Hox-Like Genes
Source: PubMed Central journal article supplement (PMC1931613; doi:10.1371/journal.pone.0000694), 2007-08-01

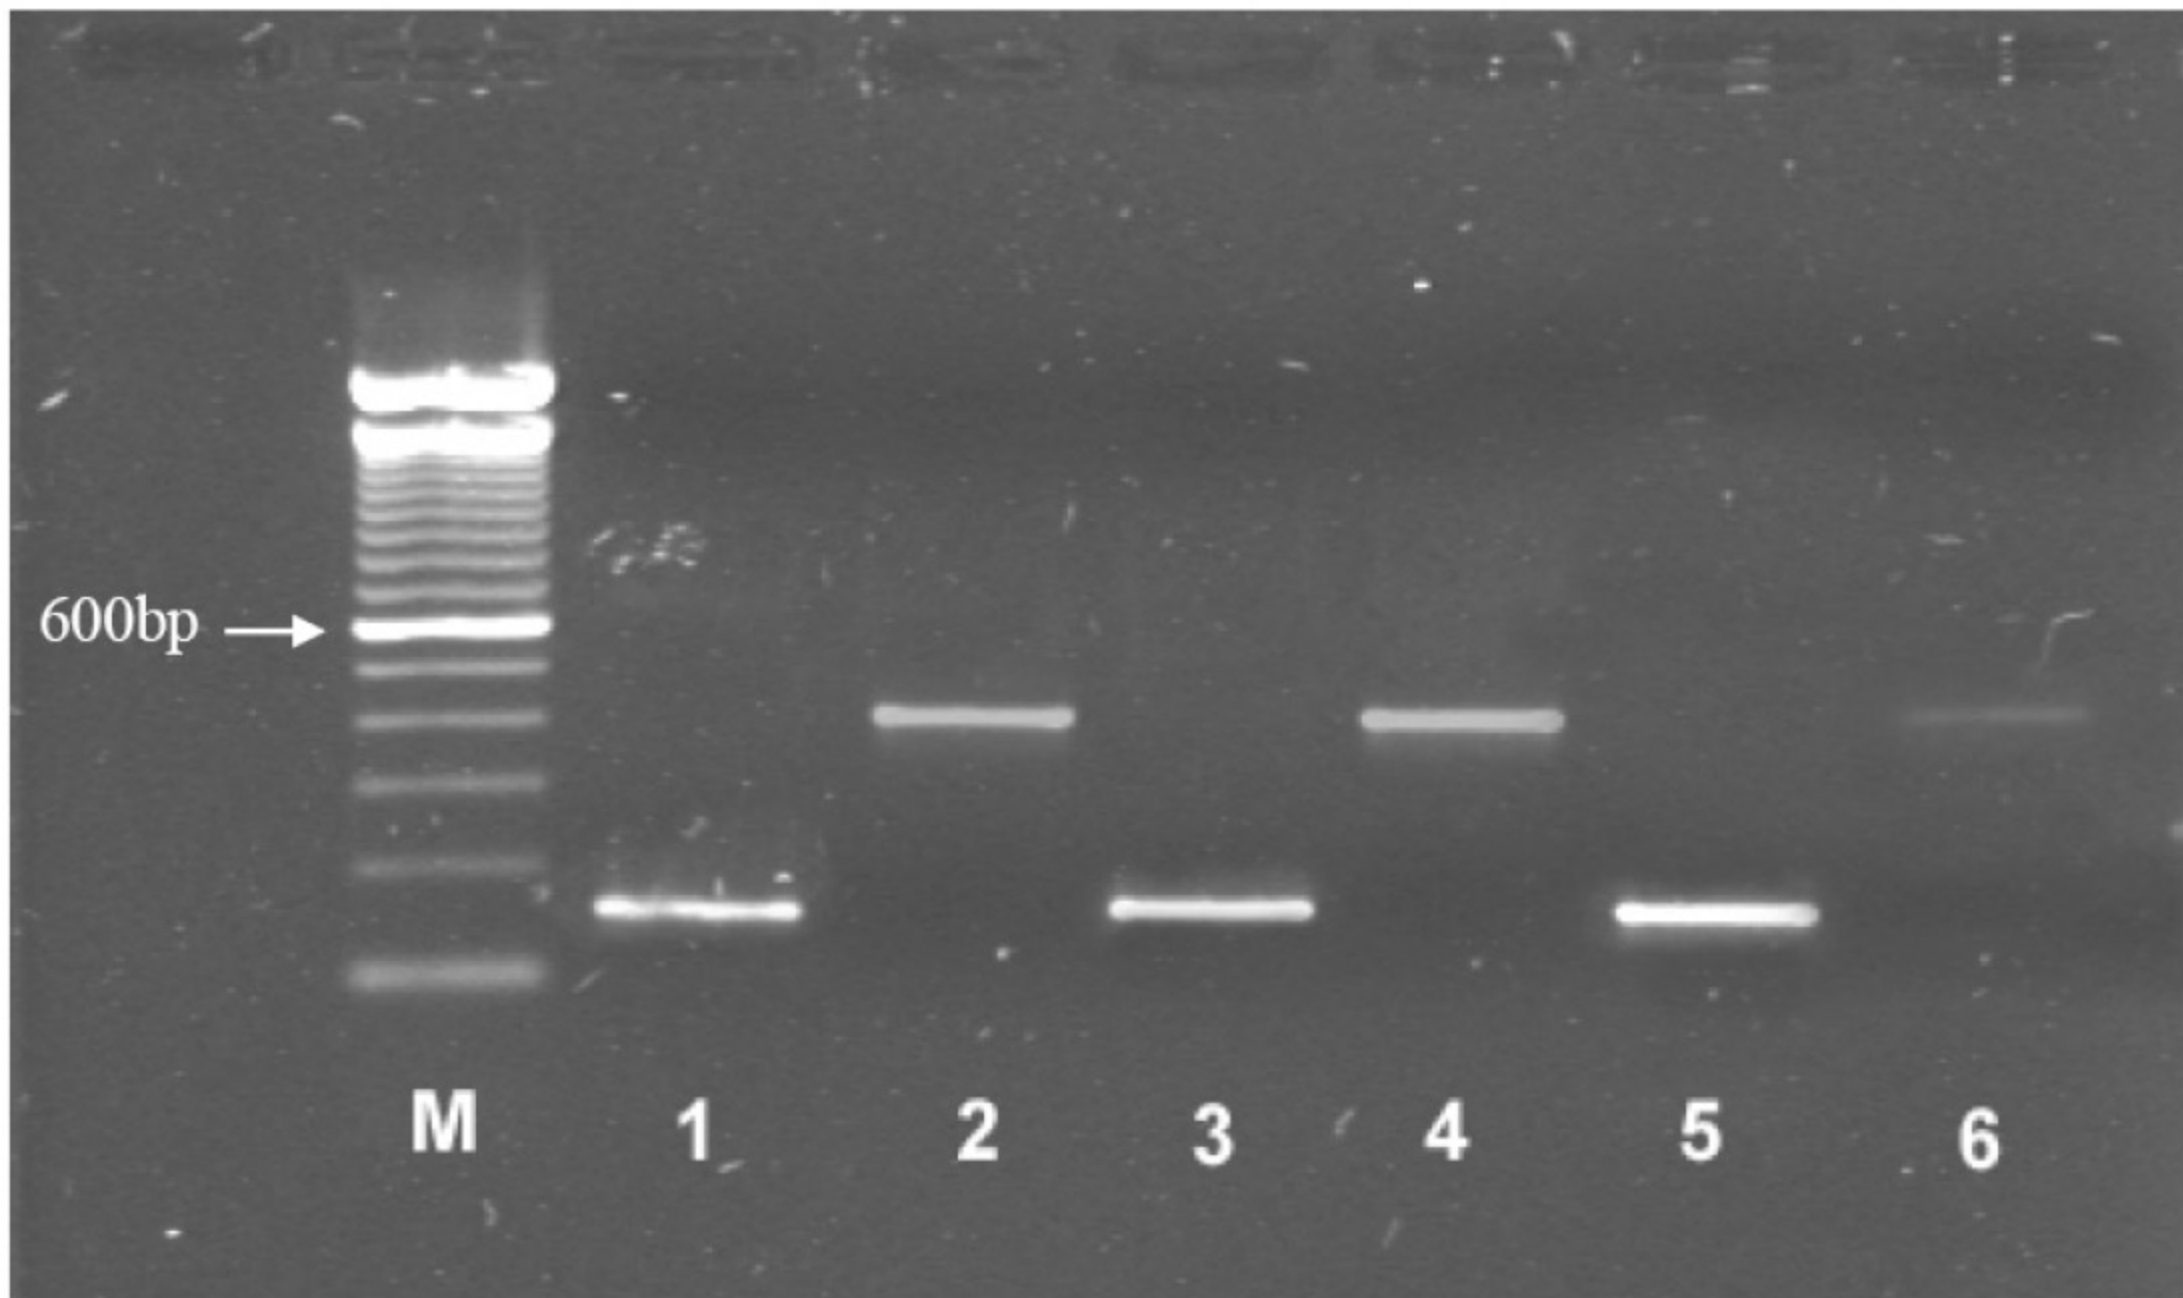

Supplement: pone.0000694.s004.pdf [file pone.0000694.s004.pdf]
